# Supplementary material
Source: PubMed Central journal article supplement (PMC7963075)
Supplement: bioinformatics_35_12_2029_s5.pdf [file bioinformatics_35_12_2029_s5.pdf]

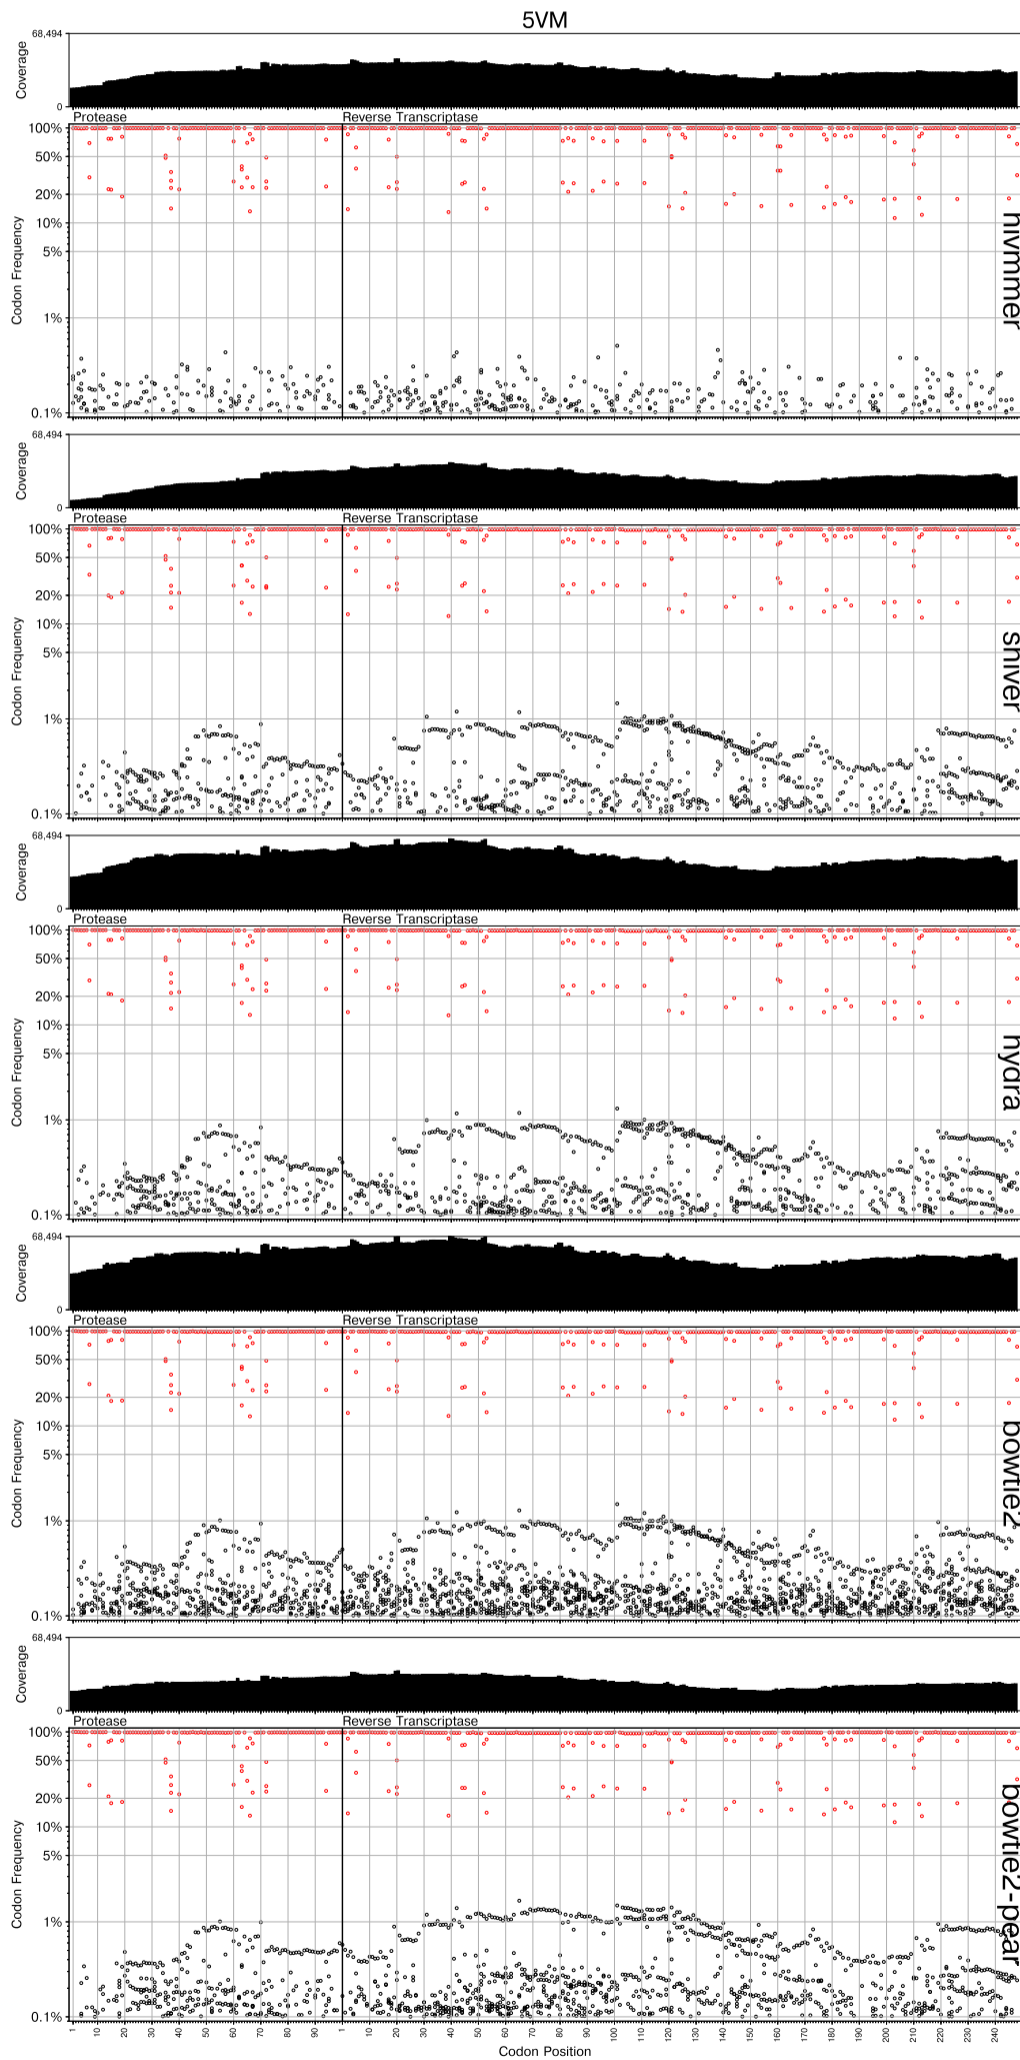

Fig. S1. Detailed view of variant calls for the SVM data set.

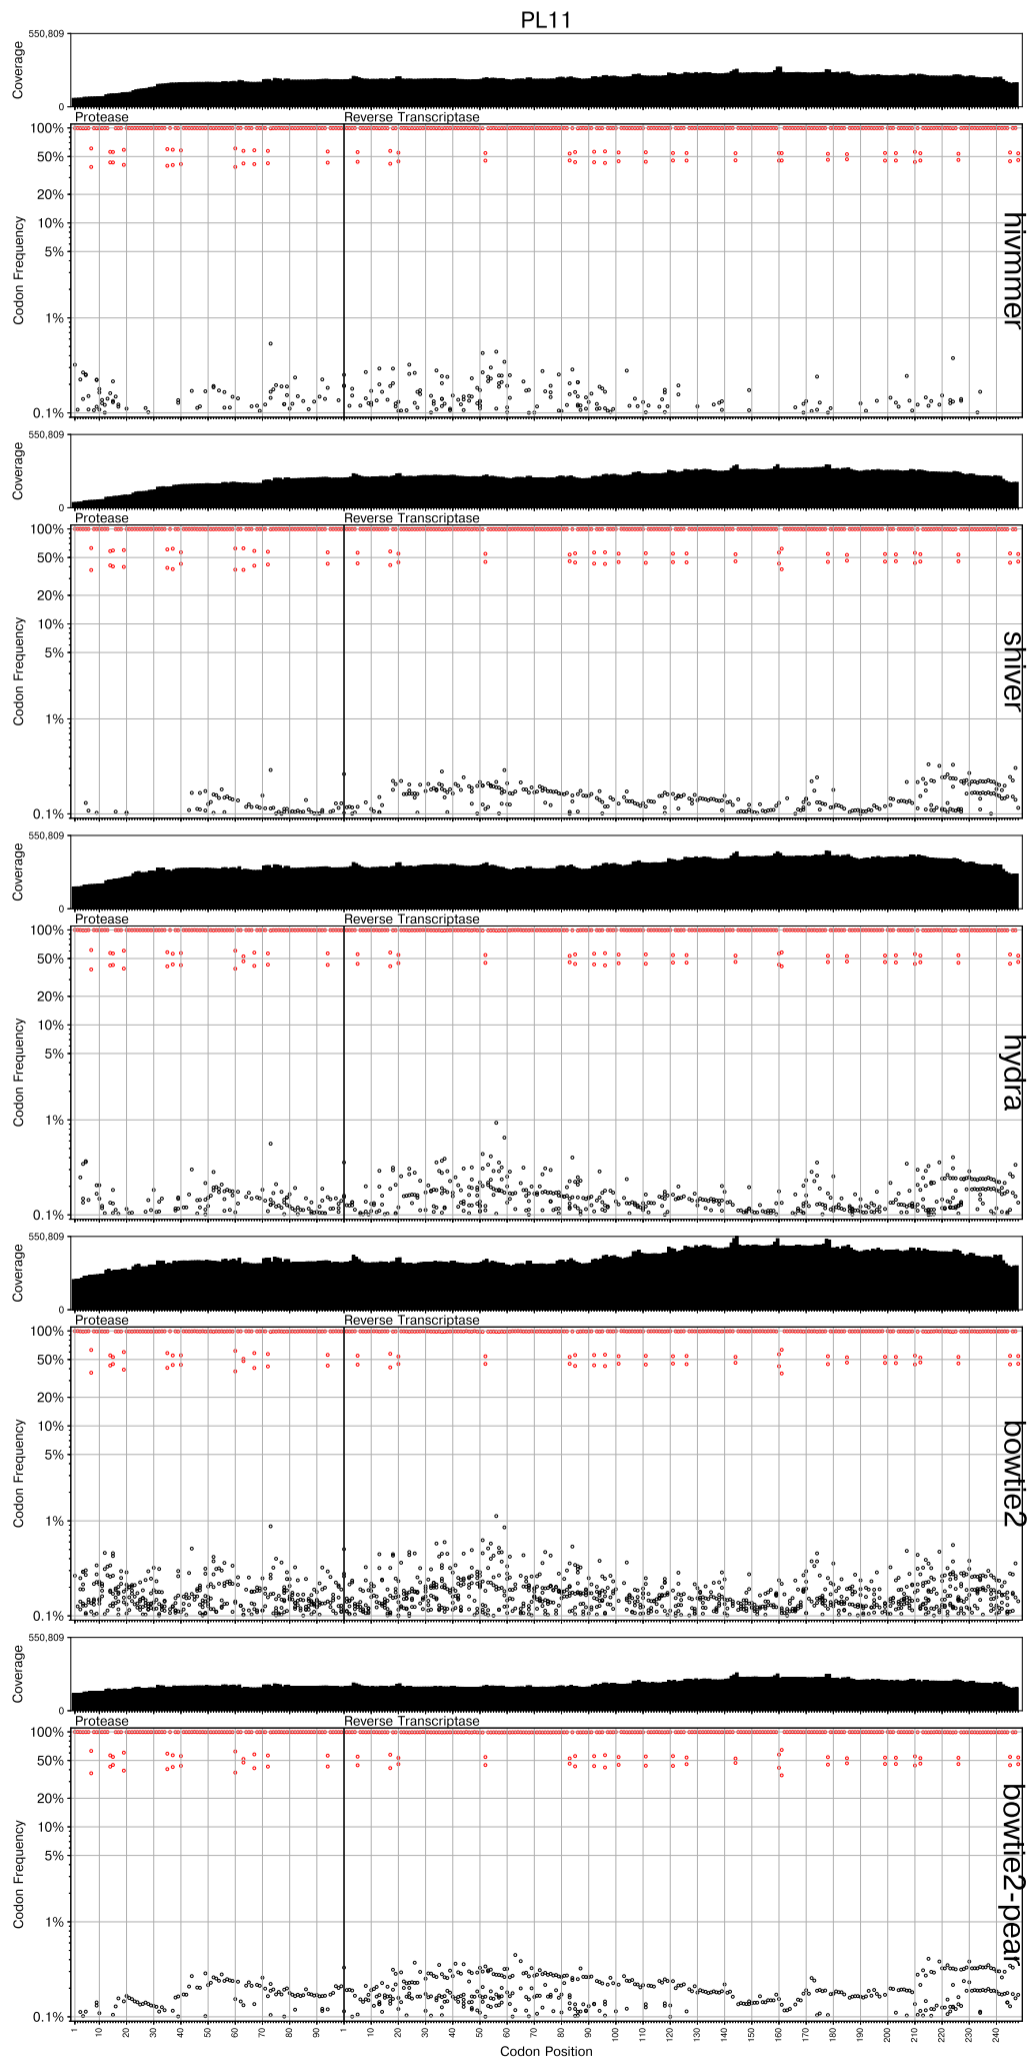

Fig. S2. Detailed view of variant calls for the PL1:1 data set.

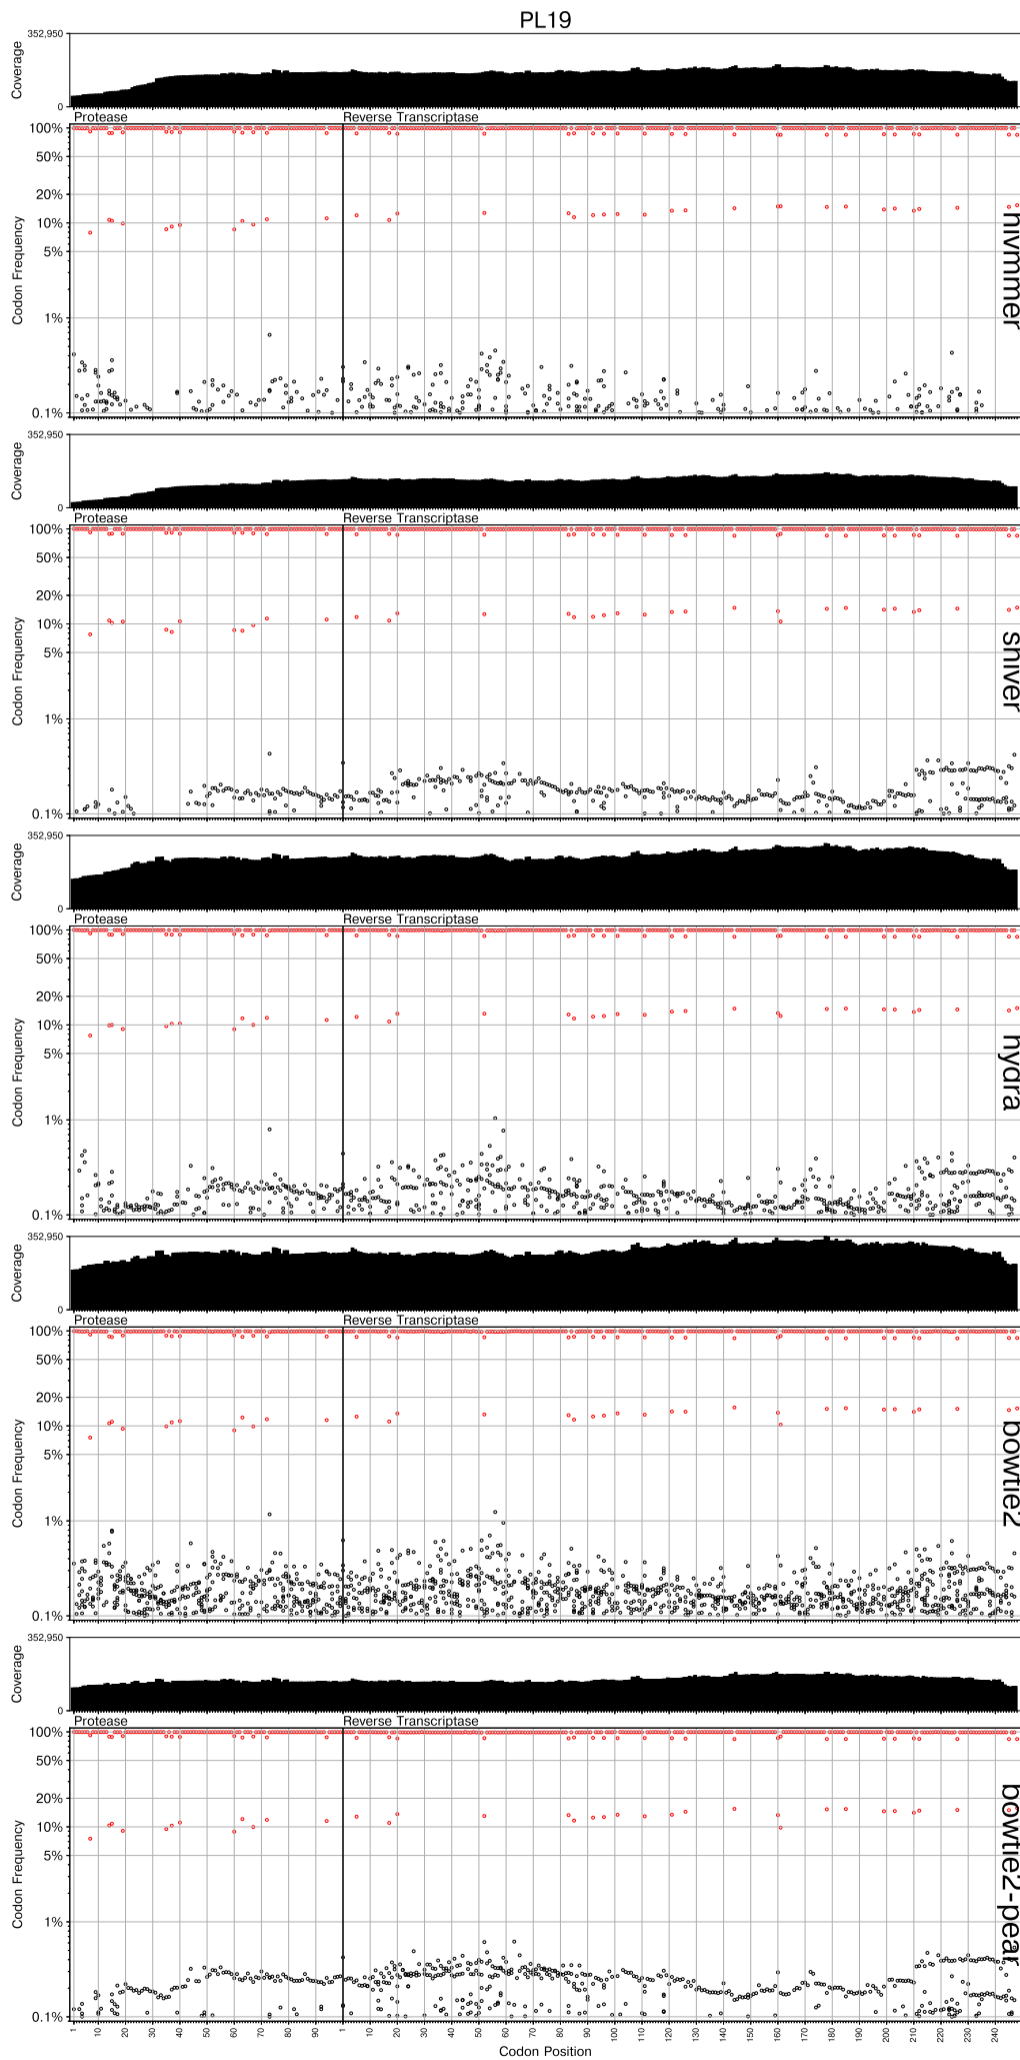

Fig. S3. Detailed view of variant calls for the PL1-9 data set.

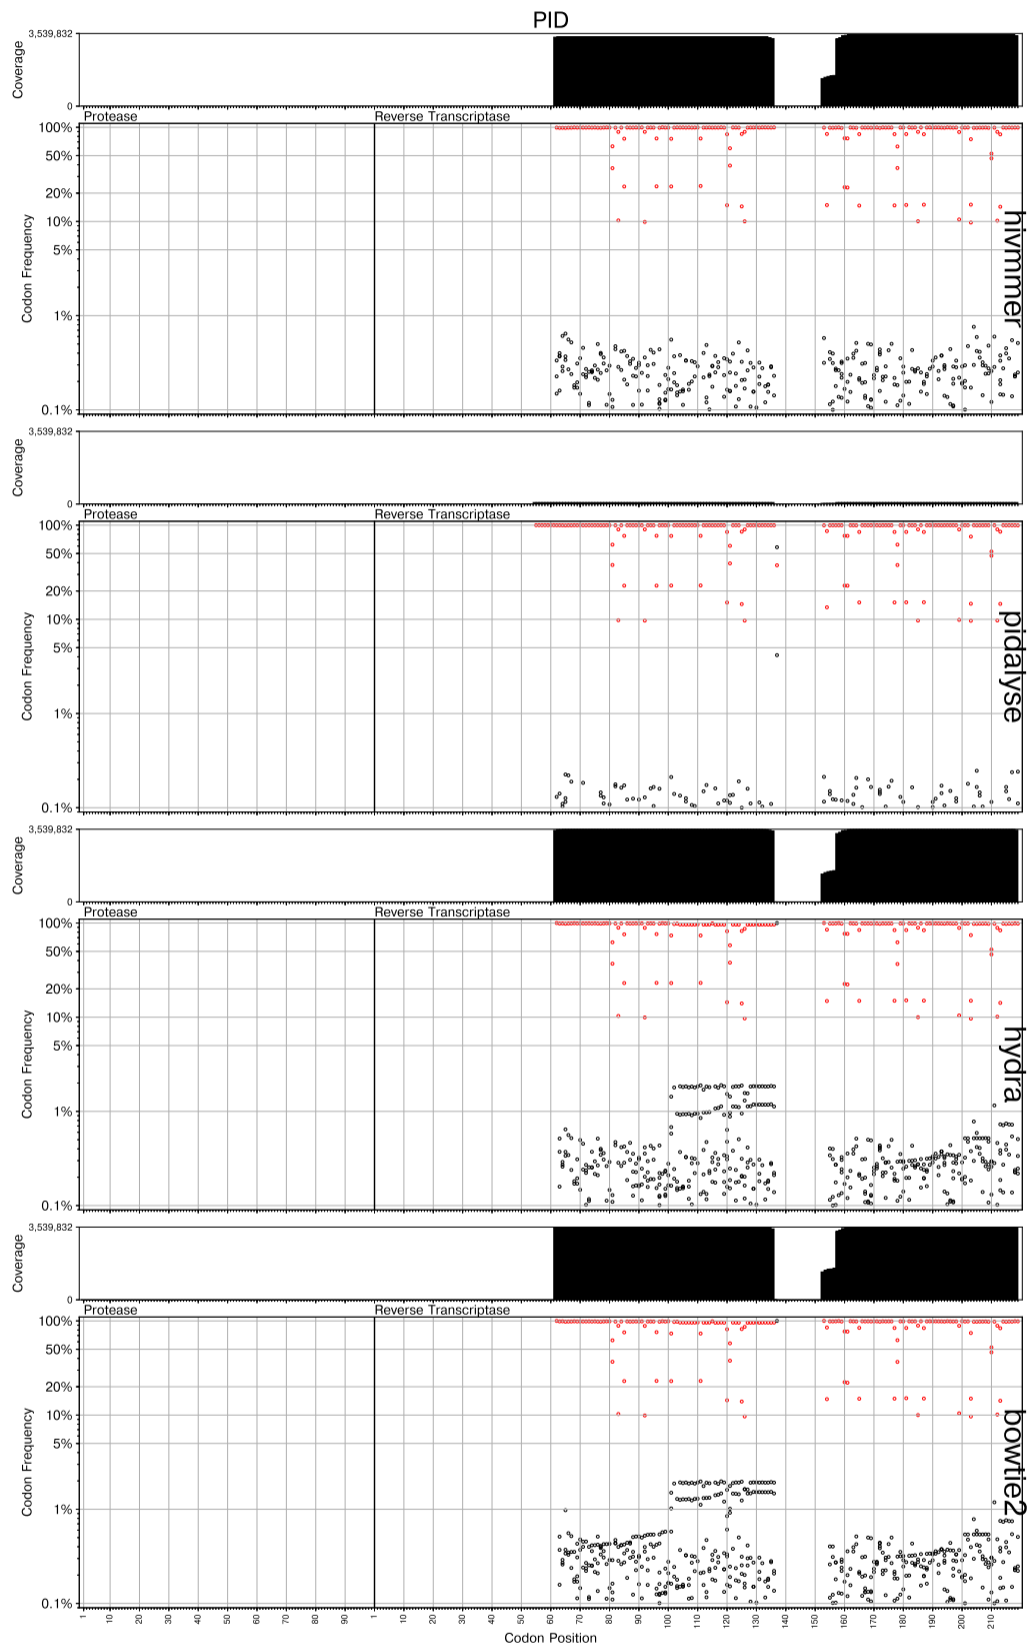

Fig. S4. Detailed view of variant calls for the PID data set.
